# Supplementary material for: Biochemical and Biophysical Characterization of Recombinant Human 3-Phosphoglycerate Dehydrogenase
Source: MDPI journal article supplement (doi:10.3390/ijms22084231), 2021-04-19
Supplement: s1 [file s1]

## **Supplementary**

### **Biochemical and biophysical characterization of recombinant human 3-phosphoglycerate dehydrogenase**

Giulia Murtas<sup>1\*</sup>, Giorgia Letizia Marcone<sup>1</sup>, Alessio Peracchi<sup>2</sup>, Erika Zangelmi<sup>2</sup>, Loredano Pollegioni<sup>1</sup>

<sup>1</sup>Department of Biotechnology and Life Sciences, University of Insubria, via J.H. Dunant 3, 21100 Varese, Italy

<sup>2</sup> Department of Chemistry, Life Sciences and Environmental Sustainability, University of Parma, 43124 Parma, Italy

\*Corresponding author: Giulia Murtas, Department of Biotechnology and Life Sciences, University of Insubria, via J.H. Dunant 3, 21100 Varese, Italy

e-mail address: [g.murtas@uninsubria.it](mailto:g.murtas@uninsubria.it)

**Table S1.** Purification of recombinant hPHGDH from 16 g of *E. coli* BL21(DE3) cells (2.8 L of fermentation broth).

| Sample        | Activity<br>(U) | Proteins<br>(mg) | Specific activity<br>(U/mg) | Yield<br>(%) | Purification<br>index |
|---------------|-----------------|------------------|-----------------------------|--------------|-----------------------|
| Crude extract | 363             | 2950             | 0.12                        | 100          | 1                     |
| Pure enzyme   | 350             | 270              | 1.32                        | 83           | 11                    |

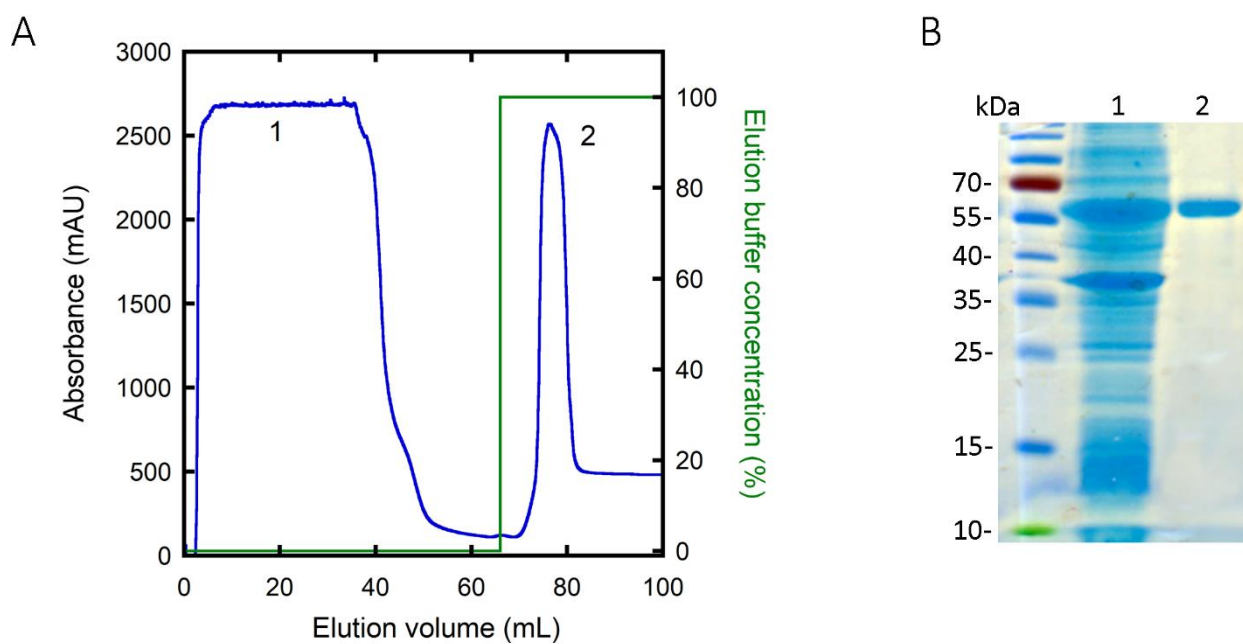

**Figure S1:** Purification of hPHGDH from *E. coli* crude extract. A) Chromatogram of the purification of His-tagged hPHGDH on a HiTrap chelating column. B) SDS-PAGE analysis of crude extract (fraction 1) and of purified hPHGDH (fraction 2).

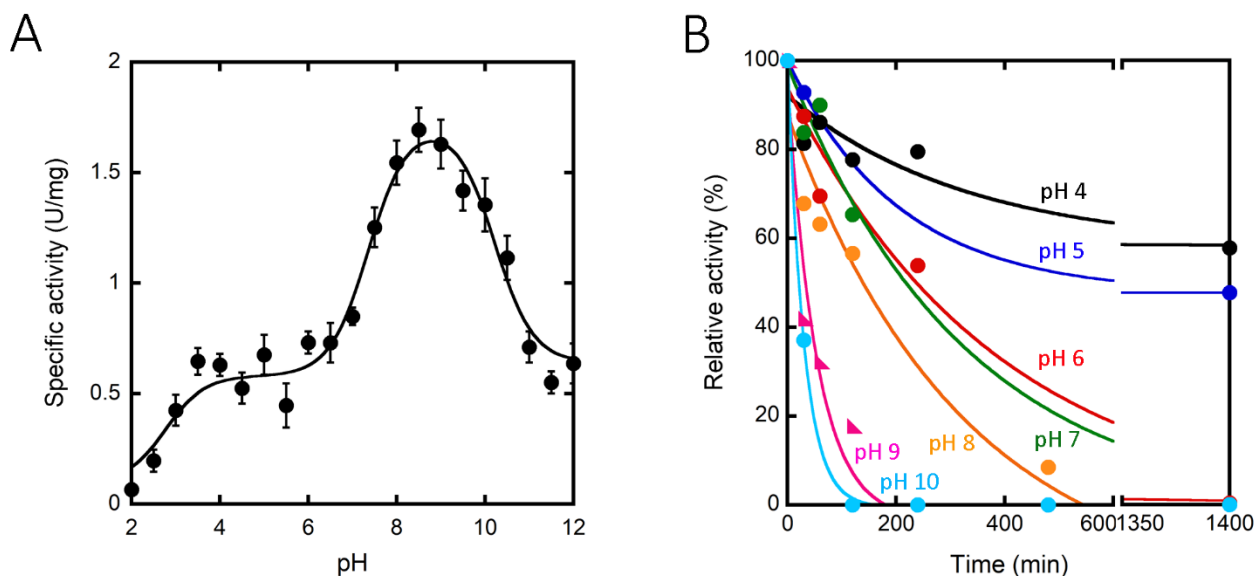

**Figure S2:** Effect of pH on activity (A) and stability (B) of hPHGDH. A) The activity was assayed at 2.4 mM 3PG and 0.12 mM NAD<sup>+</sup>, following the incubation at 37 °C in a multi-component buffer at different pH values. Data points (mean  $\pm$  SD, n = 3) were fitted according to the following equation [44]:  $y = \frac{[a_1 + b_1 \cdot 10^{(c_1 - x)}]}{1 + 10^{(c_1 - x)}} * \frac{[a_2 + b_2 \cdot 10^{(c_2 - x)}]}{1 + 10^{(c_2 - x)}} * \frac{[a_3 - b_3 \cdot 10^{(c_3 - x)}]}{1 + 10^{(c_3 - x)}}$  yielding apparent  $pK_{a1} = 2.8$ ;  $pK_{a2} = 7.4$ ;  $pK_{a3} = 10.2$ . B) Time course of hPHGDH residual activity following the incubation at different pH values (from 4 to 10, from top to bottom lines) and 37 °C. The residual activity of hPHGDH was assessed after 30, 60, 120, 240, 480 or 1400 min of incubation, and is related to the value determined at time = 0 min for each condition.

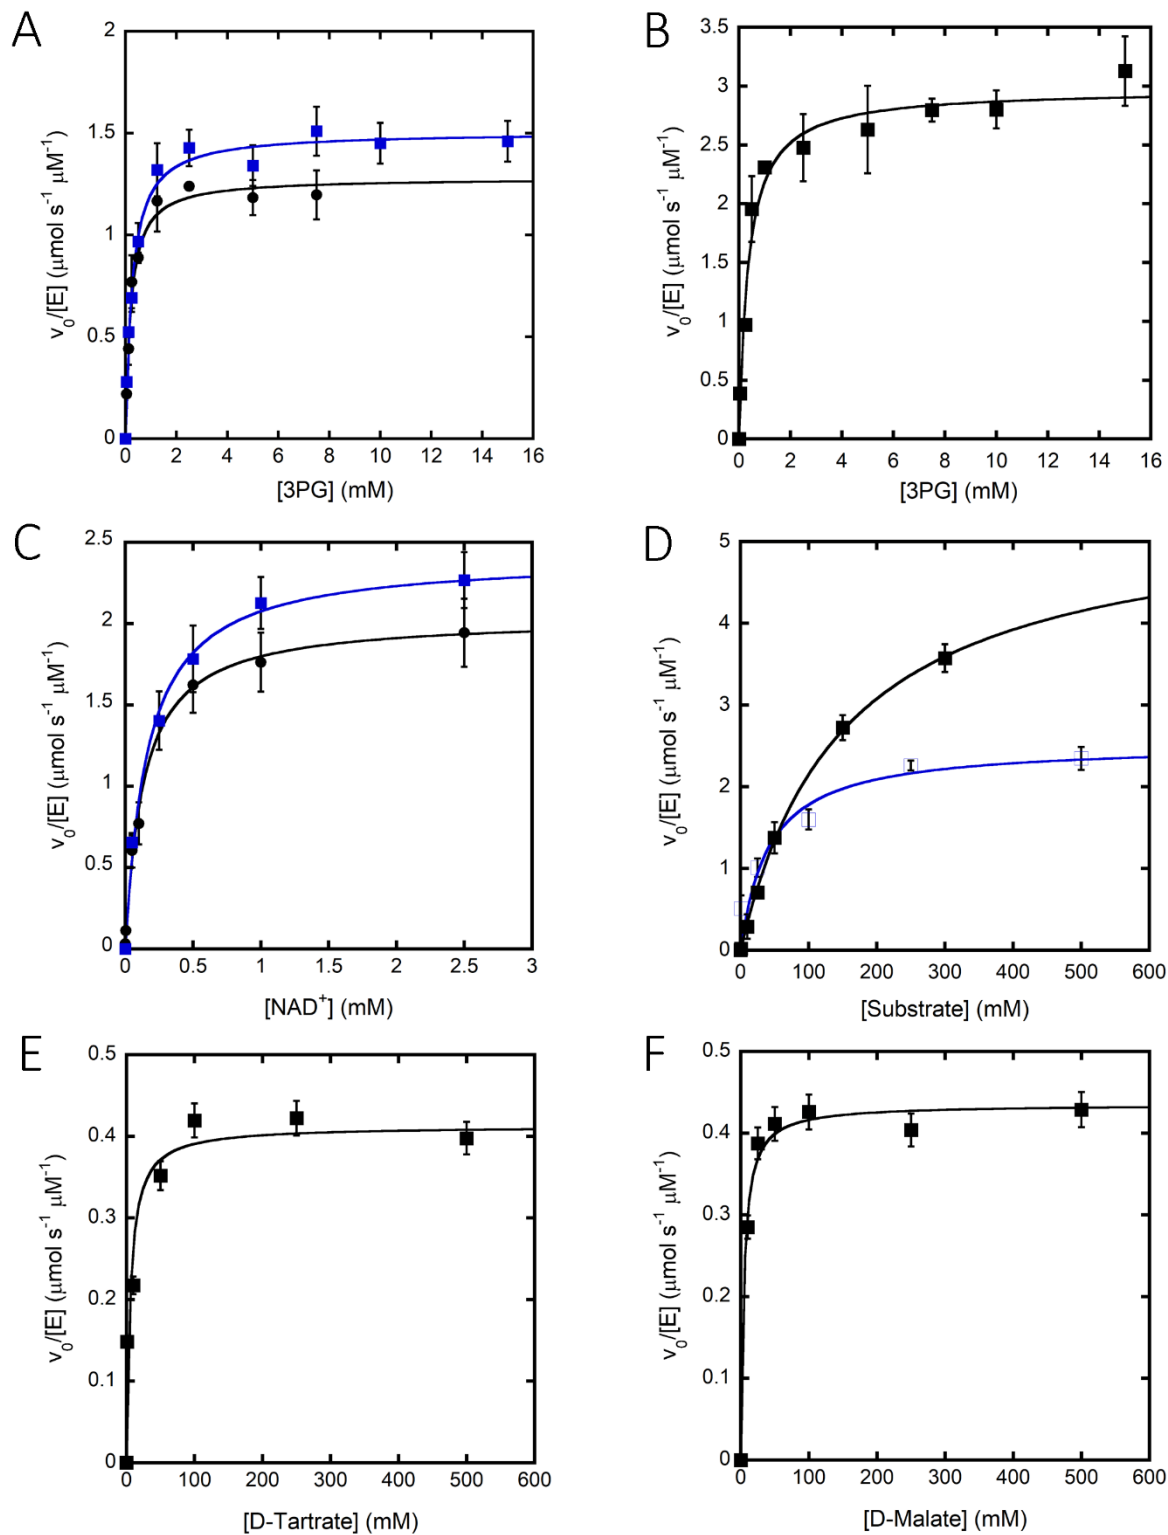

**Figure S3:** Kinetics of hPHGDH in the forward direction on different substrates. A) 3PG at 120  $\mu\text{M}$   $\text{NAD}^+$  using the PSAT-coupled assay (circles) and the hydrazine (blue squares) assays,  $y = 1.282 x / (0.2518 + x)$ ,  $y = 1.5348 x / (0.3174 + x)$ , respectively; B) 3PG at 1.5 mM  $\text{NAD}^+$  using the hydrazine assay,  $y = 2.972 x / (0.3595 + x)$ ; C)  $\text{NAD}^+$  at 2.5 mM 3PG using the PSAT-coupled assay (circles) and the hydrazine (blue squares) assays,  $y = 2.039 x / (0.13324 + x)$  and  $y = 2.4118 x / (0.16168 +$

x), respectively; D) D-3-hydroxybutyrate (open blue symbols) and D-lactate (closed symbols) at 1.5 mM NAD<sup>+</sup>,  $y = 2.527 x / (41.812 + x)$  and  $y = 5.407 x / (151.35 + x)$ , respectively; E) D-tartrate at 1.5 mM NAD<sup>+</sup>,  $y = 0.4125 x / (5.551 + x)$ ; F) D-malate at 1.5 mM NAD<sup>+</sup>,  $y = 0.4351 x / (4.4767 + x)$ . Data are shown as mean  $\pm$  SD for three measurements; where not shown, bars are smaller than symbols used.

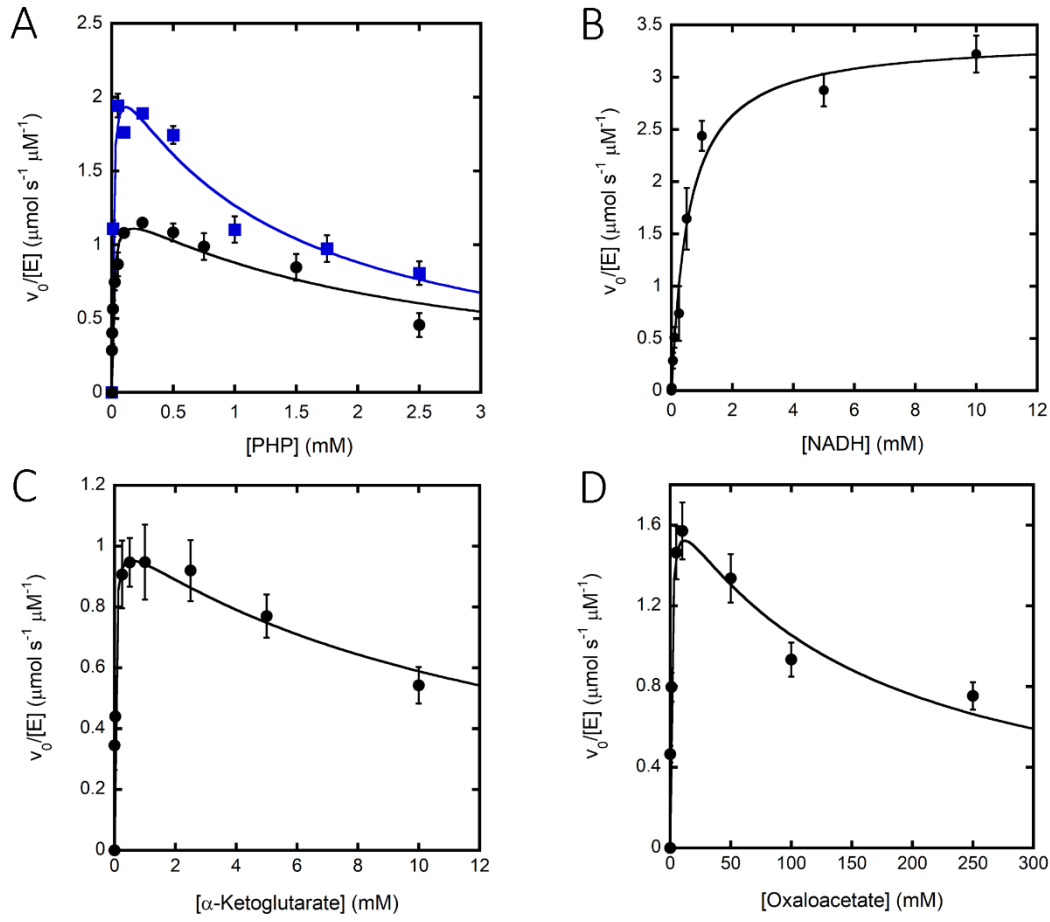

**Figure S4.** Kinetics of hPHGDH in the reverse direction on different substrates. A) PHP at 150  $\mu\text{M}$  (circles) and 5 mM (blue squares) NADH,  $y = 1.2871 x / [(0.0141 + x + (x^2/2.2257)]$  and  $y = 2.282 x / [(0.0102 + x + (x^2/1.2646)]$ , respectively; B) NADH at 0.5 mM PHP,  $y = 3.3684 x / (0.5587 + x)$ ; C)  $\alpha$ -ketoglutarate at 5 mM NADH,  $y = 1.0342 x / [(0.02372 + x + (x^2/13.285)]$ ; D) oxaloacetate at 5 mM NADH,  $y = 1.7591 x / [(0.9001 + x + (x^2/152.1)]$ . Data are shown as mean  $\pm$  SD for three measurements. For PHP,  $\alpha$ -ketoglutarate and oxaloacetate the experimental data were fit considering a substrate inhibition effect.

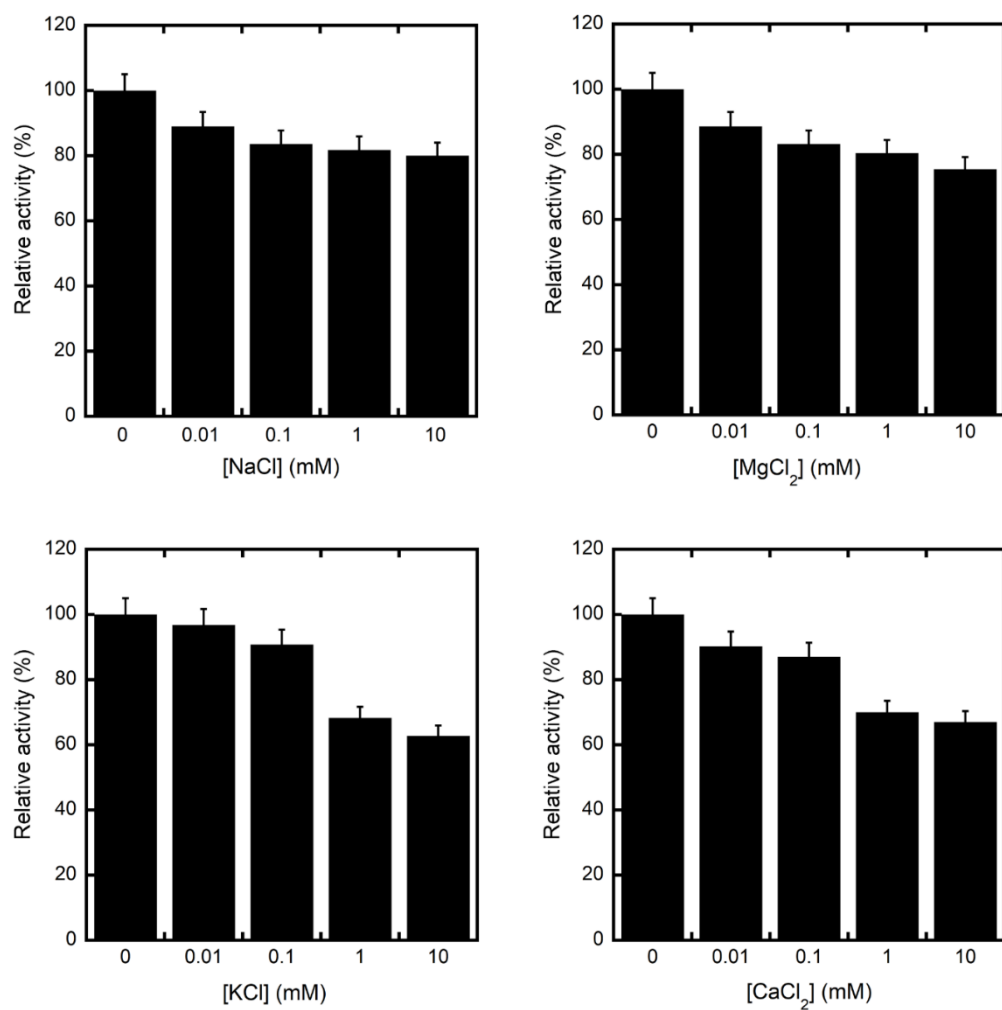

**Figure S5:** Effect of monovalent (left) and divalent (right) ions on hPHGDH activity at 2.4 mM 3PG and 0.12 mM NAD<sup>+</sup>. Data are shown as mean  $\pm$  SD for three measurements.



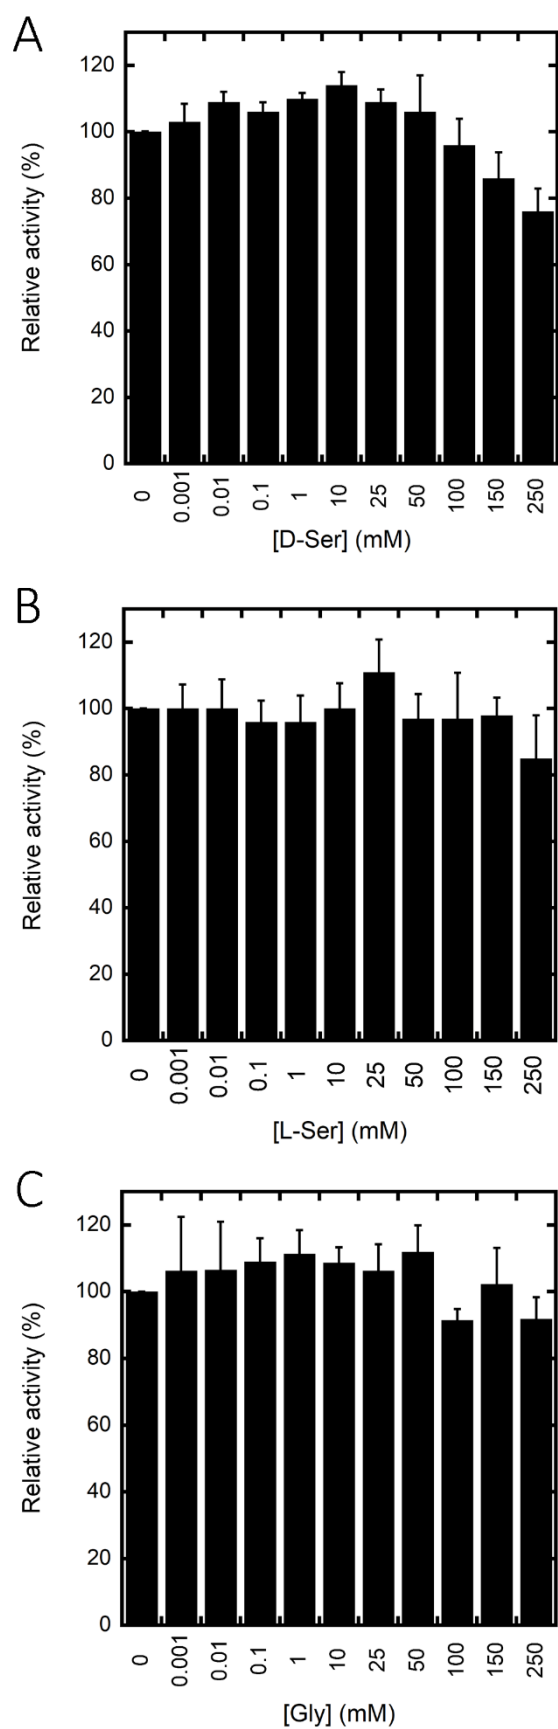

**Figure S6:** D-serine (A), L-serine (B) and glycine (C) marginally affect the activity of hPHGDH on 2.4 mM 3PG and 0.12 mM NAD<sup>+</sup>. Data are shown as mean  $\pm$  SD for three measurements.

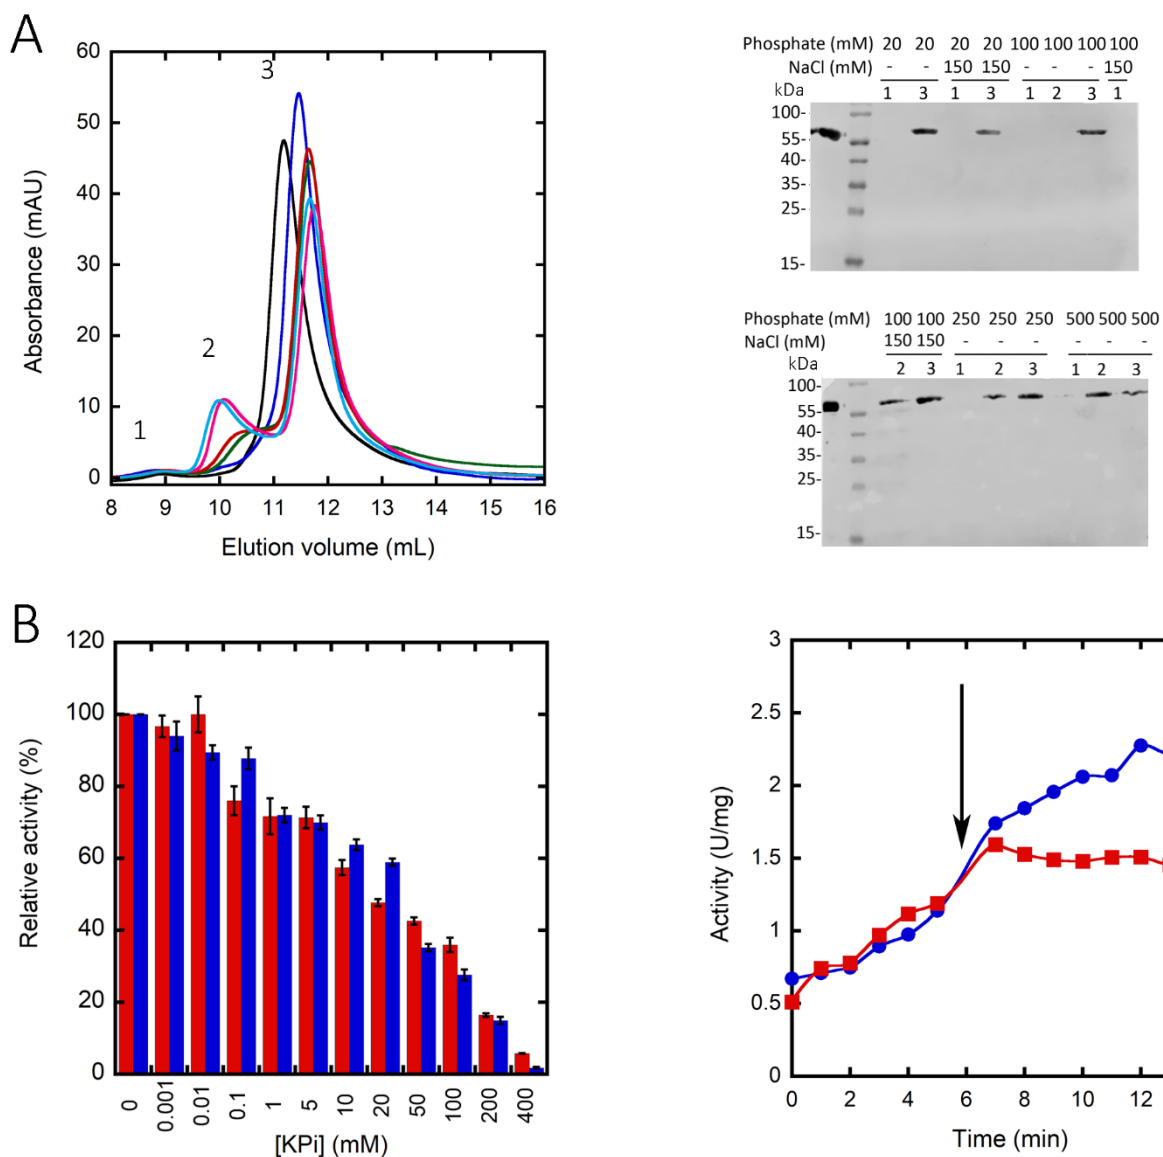

**Figure S7:** Effect of phosphate ions on hPHGDH properties. A) Oligomeric state. (Left) Size-exclusion chromatography elution profiles of hPHGDH at different concentrations of phosphate buffer: 20 mM (black), 20 mM + 150 mM NaCl (blue), 100 mM (green), 100 mM + 150 mM NaCl (red), 250 mM (magenta), and 500 mM (light blue). (Right) Western blot analysis of fractions eluted from size-exclusion chromatography and corresponding to different oligomerization states of the protein. Detection was performed using an anti-Histag antibody. B) Enzymatic activity. (Left) hPHGDH activity decreases at increasing potassium phosphate concentrations: forward reaction (blue bars), reverse reaction (red bars). Data are shown as mean  $\pm$  SD for three measurements. (Right) Time course of hPHGDH activity: the standard enzymatic activity (blue) is quickly inhibited by adding 250 mM potassium phosphate (red, see black arrow).

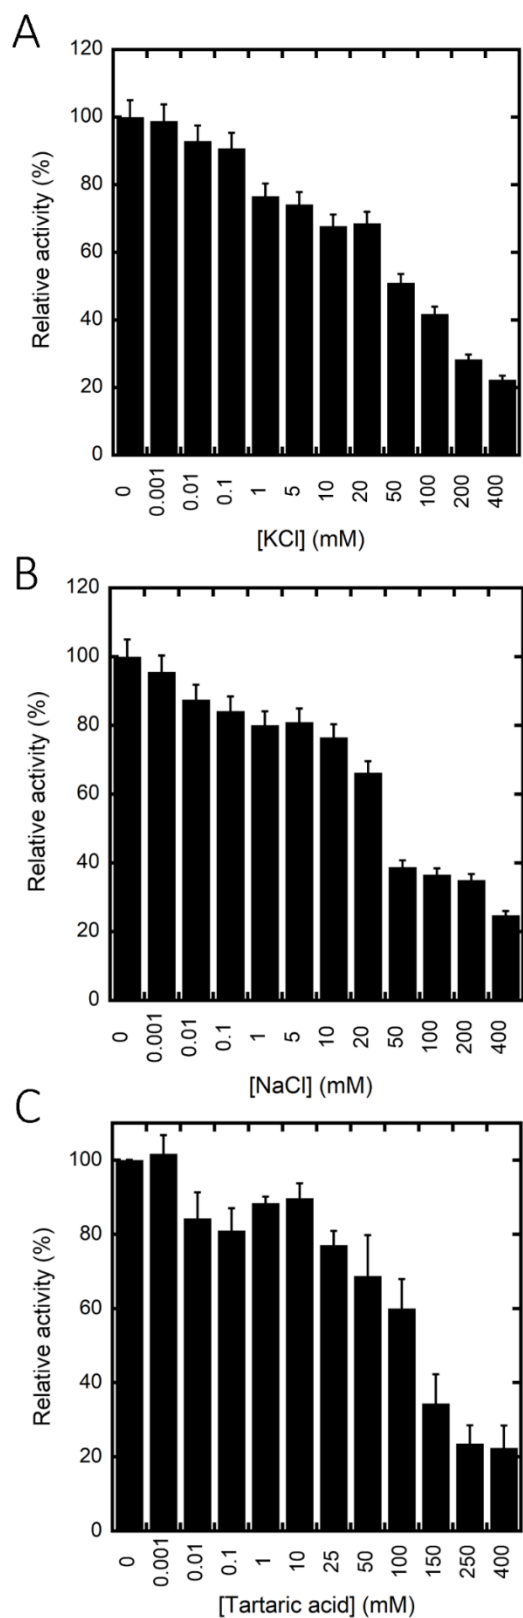

**Figure S8:** Effect of concentration of different salts on hPHGDH activity. The activity was assayed at 2.4 mM 3PG and 0.12 mM NAD<sup>+</sup> in presence of different amount of KCl (A), NaCl (B) and sodium tartrate (C). Data are shown as mean  $\pm$  SD for three measurements.

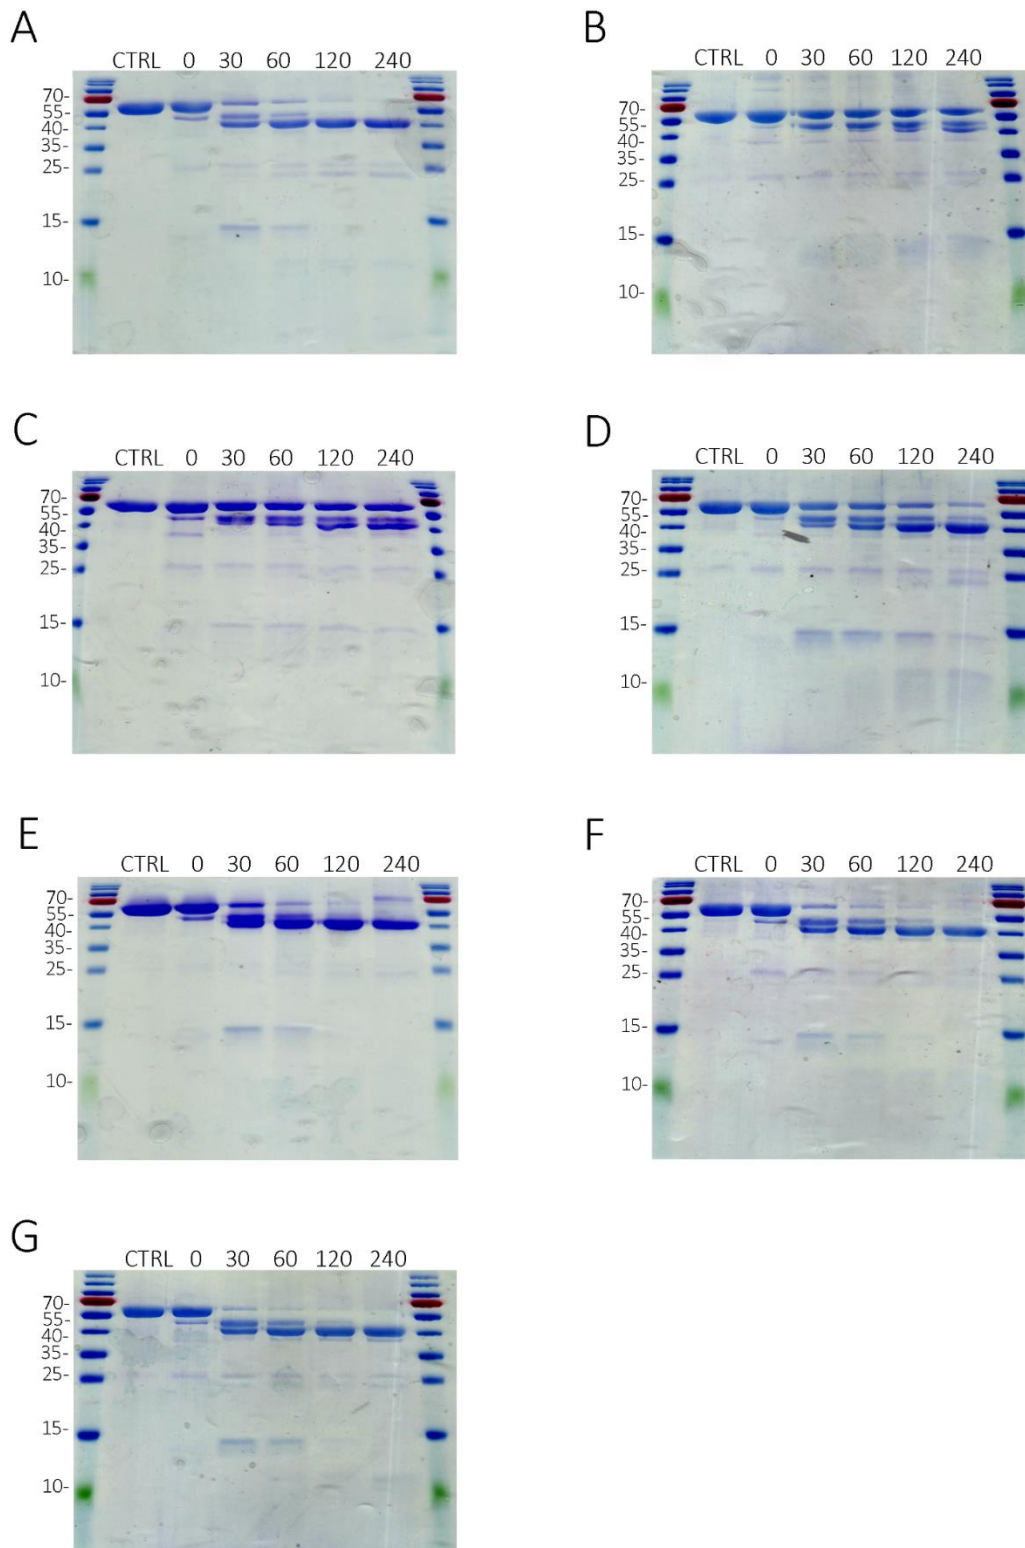

**Figure S9:** Limited proteolysis of hPHGDH evaluated by SDS-PAGE. 60  $\mu$ g of hPHGDH (in 50 mM Hepes, pH 7, 100 mM NaCl, 10% glycerol, 1 mM EDTA and 5 mM 2-mercaptoethanol) was incubated at 37 °C with 5% (w/w) trypsin (panel A) and with: B) 250 mM potassium phosphate, C) 500 mM sodium tartrate, D) 0.1 mM NCT-503, E) 0.12 mM  $\text{NAD}^+$ , F) 2.4 mM 3PG, G) 0.12 mM  $\text{NAD}^+$  and 2.4 mM 3PG.
